# Supplementary material for: A Facile Design of Solution-Phase Based VS2 Multifunctional Electrode for Green Energy Harvesting and Storage
Source: MDPI journal article supplement (doi:10.3390/nano12030339), 2022-01-21
Supplement: s1 [file s1]

# A Facile Design of Solution-Phase Based VS<sub>2</sub> Multifunctional Electrode for Green Energy Harvesting and Storage

Supriya A. Patil<sup>1</sup>, Iqra Rabani<sup>1</sup>, Sajjad Hussain<sup>1</sup>, Young-Soo Seo<sup>1</sup>, Jongwan Jung<sup>1</sup>, Nabeen K. Shrestha<sup>2\*</sup>, Hyunsik Im<sup>2</sup> and Hyungsang Kim<sup>2</sup>

- <sup>1</sup> Department of Nanotechnology and Advanced Materials Engineering, Sejong University, Seoul 05006, Korea; supriyaapatil11@gmail.com (S.A.P.); iqra.rabani@yahoo.com (I.R.); shussainawan@gmail.com (S.H.); ysseo@sejong.ac.kr (Y.-S.S.); jwjung@sejong.ac.kr (J.J.)  
<sup>2</sup> Division of Physics and Semiconductor Science, Dongguk University, Seoul 04620, Korea; hyunsik7@dongguk.edu (H.I.); hskim@dongguk.edu (H.K.)  
 \* Correspondence: nabeenkshrestha@hotmail.com

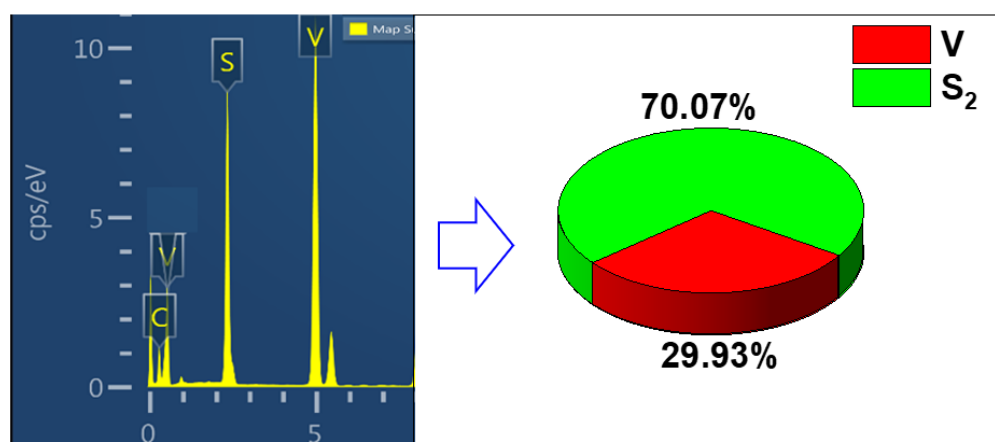

**Figure S1.** Energy-dispersive X-ray spectroscopy (EDX) analysis spectrum.

**Citation:** Patil, S.A.; Rabani, I.; Hussain, S.; Seo, Y.-S.; Jung, J.; Shrestha, N.K.; Im, H.; Kim, H. A Facile Design of Solution-Phase Based VS<sub>2</sub> Multifunctional Electrode for Green Energy Harvesting and Storage. *Nanomaterials* **2022**, *12*, x. <https://doi.org/10.3390/nano12030339>

Academic Editor: Barbara Ballarín

Received: 25 December 2021

Accepted: 19 January 2022

Published: 21 January 2022

**Publisher's Note:** MDPI stays neutral with regard to jurisdictional claims in published maps and institutional affiliations.

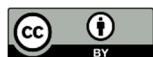

**Copyright:** © 2022 by the authors. Licensee MDPI, Basel, Switzerland. This article is an open access article distributed under the terms and conditions of the Creative Commons Attribution (CC BY) license (<https://creativecommons.org/licenses/by/4.0/>).

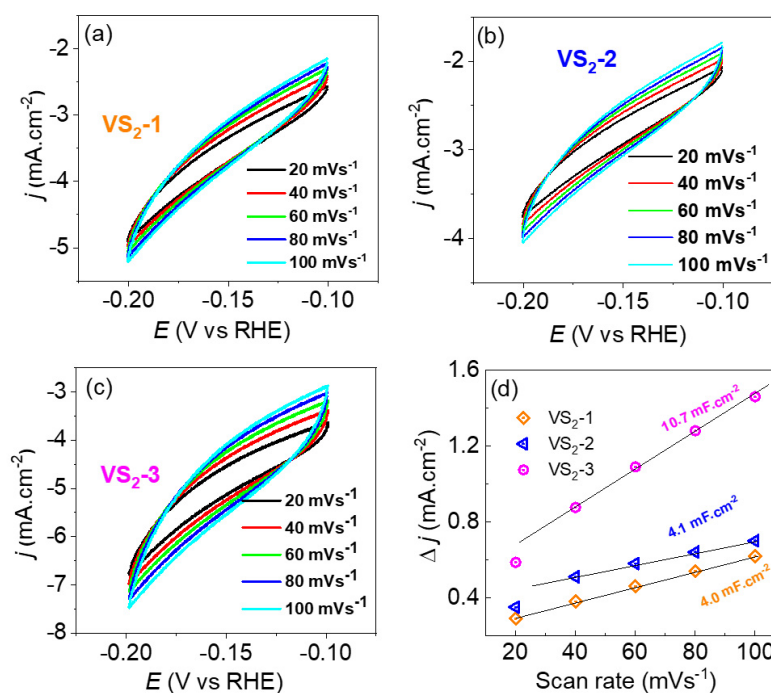

**Figure S2.** (a-c) Cyclic voltammetry (CV) curves of the VS<sub>2</sub>-1, VS<sub>2</sub>-2, VS<sub>2</sub>-3 electrodes in the non-faradic region, and (d) their corresponding scan rate versus current density plots of the electrodes.

**Table S1.** EIS parameters extracted from Nyquist plots of the VS<sub>2</sub> samples.

| Name               | H <sub>2</sub> O(S1) | EG(S2) | H <sub>2</sub> O+EG (S3) |
|--------------------|----------------------|--------|--------------------------|
| Rs(Ω)              | 1.980                | 2.102  | 1.870                    |
| Rct (Ω)            | 2.910                | 3.080  | 2.410                    |
| CPE(μF)            | 0.710                | 0.663  | 0.618                    |
| Z <sub>w</sub> (Ω) | 0.028                | 0.023  | 0.021                    |

**Table S2.** Comparison of HER performance of the VS<sub>2</sub> -3 catalyst with the recently reported transition metal-based metal catalysts in acidic (0.5 M H<sub>2</sub>SO<sub>4</sub>) electrolyte.

| No | Catalyst name                                       | Electrolyte                          | Overpotential<br>(mV)<br>@ 10mAcm <sup>-2</sup> | Reference                                               |
|----|-----------------------------------------------------|--------------------------------------|-------------------------------------------------|---------------------------------------------------------|
|    | VS <sub>2</sub> -3                                  | 0.5 M H <sub>2</sub> SO <sub>4</sub> | 161                                             | This work                                               |
| 1  | SnS <sub>2</sub> /NF                                | 0.5 M H <sub>2</sub> SO <sub>4</sub> | 232                                             | <i>J Hazard Mater</i> , 417 (2021), p. 126105           |
| 2  | VS <sub>4</sub> /rGO                                | 0.1 M H <sub>2</sub> SO <sub>4</sub> | 210                                             | <i>Dalton Trans.</i> , 2018,47, 13792-13799             |
| 3  | CoS <sub>2</sub> /rGO                               | 0.5 M H <sub>2</sub> SO <sub>4</sub> | 150                                             | <i>Nano Convergence</i> , 2016, 3:5.                    |
| 4  | NiS <sub>2</sub> /rGO                               | 0.5 M H <sub>2</sub> SO <sub>4</sub> | 200                                             | <i>Catalysis Communications</i> , 2016, 85, 26          |
| 5  | Annealed WS <sub>2</sub> /CC                        | 0.5 M H <sub>2</sub> SO <sub>4</sub> | 250                                             | <i>J. Mater. Chem. A</i> , 2015, 3, 131                 |
| 6  | VS <sub>2</sub> /ZnS/CdS                            | 0.5 M H <sub>2</sub> SO <sub>4</sub> | 86                                              | <i>Nano Convergence</i> (2016) 3:5                      |
| 7  | VS <sub>2</sub> @MoS <sub>2</sub>                   | 0.5 M H <sub>2</sub> SO <sub>4</sub> | 177                                             | <i>ACS Appl. Mater. Interfaces</i> 2017, 9, 42139–42148 |
| 8  | V <sub>0.09</sub> Mo <sub>0.91</sub> S <sub>2</sub> | 0.5 M H <sub>2</sub> SO <sub>4</sub> | 240                                             | <i>Nanoscale</i> 2014, 6, 8359–8367                     |

**Table S3.** Comparison of HER performance of the VS<sub>2</sub> -3 catalyst with the recently reported transition metal-based metal catalysts in alkaline (1M KOH) electrolyte.

| No | Catalyst name                                  | Electrolyte | Overpotential<br>(mV)<br>@ 10mAcm <sup>-2</sup> | Reference                                           |
|----|------------------------------------------------|-------------|-------------------------------------------------|-----------------------------------------------------|
|    | VS <sub>2</sub> -3                             | 1M KOH      | 197                                             | This work                                           |
| 1  | VO-S/NF                                        | 1M KOH      | 165                                             | <i>Applied Surface Science</i> 423 (2017) 1090–1096 |
| 2  | Ni@C/Ni foam                                   | 1M KOH      | 270                                             | <i>J. Mater. Chem. A</i> 4 (2016) 7297-7304.        |
| 3  | NiCo <sub>2</sub> S <sub>4</sub> /carbon cloth | 1M KOH      | 305                                             | <i>Nanoscale</i> 7 (2015) 15122-15126.              |
| 4  | NiFe layered double hydroxides/Ni foam         | 1M KOH      | 210                                             | <i>Science</i> 345 (2014) 1593-1596.                |
| 5  | NiFeS/NF                                       | 1M KOH      | 180                                             | <i>J. Mater. Chem. A</i> 4 (2016) 16394-16402.      |

**Table S4.** EIS parameters extracted from Nyquist plots of the VS<sub>2</sub> samples.

| Name               | R <sub>s</sub> ( $\Omega$ ) | R <sub>ct</sub> ( $\Omega$ ) |
|--------------------|-----------------------------|------------------------------|
| VS <sub>2</sub> -1 | 1.12                        | 1.45                         |
| VS <sub>2</sub> -2 | 0.46                        | 1.12                         |
| VS <sub>2</sub> -3 | 0.24                        | 0.945                        |
